# Supplementary material for: Impact of a Patient-centered Medical Home on Healthcare Utilization for Patients With Complex Needs in Singapore: a Matched Cohort Study
Source: Research Square preprint supplement (doi:10.21203/rs.3.rs-1151743/v1), 2022-02-18
Supplement: Supplementary file 1 [file 47339eb27e45abc75e5bda68.docx]

**Appendix Table 1** Two-part model results for polyclinic visits

| **Polyclinic visits** | | | |
| --- | --- | --- | --- |
|  | Part 1 (Logistic)  OR (95% CI), *p* | Part 2 (Poisson)  Log-counts (95% CI), *p* | Combined (Margins)  dy/dx (95%CI), *p* |
| **Time since enrolment** |  |  |  |
| ≥8 quarters before enrolment quarter [Q-8] | 0.39 (0.28,0.53), <0.001 | 0.05 (-0.10,0.20), 0.53 | -0.42 (-0.61,-0.22), <0.001 |
| 7Q quarters before enrolment quarter [Q-7] | 1.13 (0.79,1.62), 0.51 | 0.001 (-0.20,0.21), 0.99 | 0.060 (-0.18,0.30), 0.64 |
| 6 quarters before enrolment quarter [Q-6] | 1.24 (0.86,1.77), 0.25 | <0.001 (-0.18,0.18), 1.00 | 0.10 (-0.13,0.33), 0.38 |
| 5 quarters before enrolment quarter [Q-5] | 1.25 (0.90,1.73), 0.18 | -0.006 (-0.20,0.18), 0.95 | 0.10 (-0.12,0.32), 0.37 |
| 4 quarters before enrolment quarter [Q-4] | 1.26 (0.87,1.82), 0.23 | 0.052 (-0.16,0.27), 0.64 | 0.15 (-0.098,0.40), 0.23 |
| 3 quarters before enrolment quarter [Q-3] | 0.99 (0.73,1.34), 0.94 | 0.11 (-0.17,0.38), 0.45 | 0.081 (-0.19,0.35), 0.55 |
| 2 quarters before enrolment quarter [Q-2] | 1.34 (0.93,1.94), 0.11 | 0.12 (-0.12,0.36), 0.34 | 0.24 (-0.025,0.50), 0.076 |
| (Quarter before enrolment quarter [Q-1]) | 1 | 0 | 0 |
| Enrolment quarter [Q0] | 0.44 (0.30,0.66), <0.001 | -0.043 (-0.25,0.17), 0.69 | -0.43 (-0.68,-0.17), 0.001 |
| Quarter after enrolment quarter [Q1] | 0.34 (0.22,0.53), <0.001 | -0.27 (-0.49,-0.054), 0.014 | -0.74 (-1.02,-0.46), <0.001 |
| 2 quarters after enrolment quarter [Q2] | 0.32 (0.20,0.52), <0.001 | -0.20 (-0.44,0.044), 0.11 | -0.71 (-1.01,-0.41), <0.001 |
| 3 quarters after enrolment quarter [Q3] | 0.35 (0.22,0.55), <0.001 | -0.21 (-0.54,0.12), 0.21 | -0.68 (-1.03,-0.33), <0.001 |
| ≥4 quarters after enrolment quarter [Q4] | 0.19 (0.10,0.38), <0.001 | -0.35 (-0.60,-0.11), 0.005 | -1.08 (-1.46,-0.70), <0.001 |
| **Calendar Time** |  |  |  |
| 2014-15 | 1.32 (1.21,1.44), <0.001 | -0.066 (-0.14,0.013), 0.10 | 0.080 (<0.001,0.16), 0.049 |
| 2016 | 1.20 (1.11,1.29), <0.001 | -0.049 (-0.095, -0.004), 0.03 | 0.048 (-0.005,0.10), 0.074 |
| 2017 | 1.07 (1.00,1.13), 0.035 | -0.024 (-0.069,0.022), 0.32 | 0.013 (-0.035,0.060), 0.60 |
| 2018 | 0.99 (0.94,1.04), 0.59 | -0.062 (-0.099,-0.025), 0.001 | -0.054 (-0.091,-0.017), 0.004 |
| (2019) | 1 | 0 | 0 |
| 2020 | 0.98 (0.91,1.07), 0.71 | 0.013 (-0.036,0.063), 0.60 | 0.003 (-0.053,0.060), 0.92 |
| **Treatment**, PCMH | 0.70 (0.50,0.98), 0.039 | -0.12 (-0.26,0.020), 0.093 | -0.24 (-0.40,-0.078), 0.004 |
| **Interaction**, 2020×PCMH | 0.50 (0.20,1.25), 0.14 | 0.50 (<0.001,1.00), 0.050 | -0.003 (-0.52,0.51), 0.99 |
| **Birth year** | 1.01 (1.00,1.01), 0.10 | <0.001 (-0.002, 0.003), 0.60 | 0.003 (<0.001,0.007), 0.098 |
| **Gender**, Male | 1.04 (0.92,1.18), 0.51 | 0.13 (0.067,0.19), <0.001 | 0.13 (0.046,0.21), 0.002 |
| **Housing**, Private | 0.77 (0.28,2.12), 0.61 | -0.38 (-0.52,-0.24), <0.001 | -0.35 (-0.66,-0.027), 0.033 |
| **Ethnicity** |  |  |  |
| Indian & Sikh | 1.61 (1.13,2.31), 0.009 | 0.018 (-0.073,0.11), 0.70 | 0.26 (0.049,0.46), 0.015 |
| Malay | 0.96 (0.33,2.79), 0.94 | -0.048 (-0.25,0.15), 0.64 | -0.057 (-0.57,0.45), 0.83 |
| **CCI** | 1.26 (1.21,1.32), <0.001 | 0.031 (0.015,0.047), <0.001 | 0.14 (0.11,0.16), <0.001 |

**Appendix Table 2** Two-part model results for SOC visits

| **Specialist Outpatient Clinic visits** | | | |
| --- | --- | --- | --- |
|  | Part 1 (Logistic)  OR (95% CI), *p* | Part 2 (Poisson)  Log-counts (95% CI), *p* | Combined (Margins)  dy/dx (95%CI), *p* |
| **Time since enrolment** |  |  |  |
| ≥8 quarters before enrolment quarter [Q-8] | 0.29 (0.21,0.39), <0.001 | 0.12 (-0.077,0.32), 0.23 | -0.65 (-0.89,-0.40), <0.001 |
| 7Q quarters before enrolment quarter [Q-7] | 0.68 (0.47,0.99), 0.046 | 0.080 (-0.13,0.29), 0.46 | -0.16 (-0.45,0.13), 0.28 |
| 6 quarters before enrolment quarter [Q-6] | 0.71 (0.49,1.03), 0.075 | -0.095 (-0.29,0.10), 0.35 | -0.29 (-0.57,-0.004), 0.047 |
| 5 quarters before enrolment quarter [Q-5] | 0.67 (0.46,0.96), 0.031 | 0.25 (0.007,0.49), 0.044 | -0.032 (-0.33,0.27), 0.84 |
| 4 quarters before enrolment quarter [Q-4] | 0.68 (0.47,0.98), 0.037 | 0.081 (-0.15,0.31), 0.49 | -0.17 (-0.46,0.13), 0.27 |
| 3 quarters before enrolment quarter [Q-3] | 0.76 (0.55,1.04), 0.084 | 0.040 (-0.18,0.26), 0.73 | -0.13 (-0.40,0.14), 0.33 |
| 2 quarters before enrolment quarter [Q-2] | 0.73 (0.53,1.03), 0.072 | 0.036 (-0.16,0.24), 0.72 | -0.15 (-0.42,0.11), 0.25 |
| (Quarter before enrolment quarter [Q-1]) | 1 | 0 | 0 |
| Enrolment quarter [Q0] | 0.89 (0.63,1.26), 0.52 | 0.10 (-0.10,0.30), 0.32 | 0.018 (-0.25,0.29), 0.90 |
| Quarter after enrolment quarter [Q1] | 0.86 (0.60,1.23), 0.41 | 0.35 (0.008,0.68), 0.045 | 0.20 (-0.16,0.56), 0.27 |
| 2 quarters after enrolment quarter [Q2] | 0.81 (0.56,1.18), 0.28 | -0.003 (-0.21,0.21), 0.98 | -0.13 (-0.42,0.16), 0.39 |
| 3 quarters after enrolment quarter [Q3] | 0.70 (0.49,1.02), 0.065 | 0.089 (-0.11,0.29), 0.38 | -0.13 (-0.41,0.15), 0.35 |
| ≥4 quarters after enrolment quarter [Q4] | 0.57 (0.34,0.95), 0.031 | -0.030 (-0.25,0.19), 0.79 | -0.37 (-0.73,-0.005), 0.047 |
| **Calendar Time** |  |  | 0 |
| 2014-15 | 0.71 (0.65,0.78), <0.001 | -0.14 (-0.20,-0.075), <0.001 | -0.31 (-0.38,-0.24), <0.001 |
| 2016 | 0.81 (0.75,0.88), <0.001 | -0.077 (-0.13,-0.021), 0.008 | -0.20 (-0.27,-0.13), <0.001 |
| 2017 | 0.94 (0.88,1.01), 0.081 | 0.001 (-0.050,0.053), 0.96 | -0.040 (-0.11,0.028), 0.25 |
| 2018 | 0.97 (0.91,1.03), 0.33 | -0.026 (-0.071,0.019), 0.25 | -0.046 (-0.11,0.014), 0.13 |
| (2019) | 0 | 0 | 0 |
| 2020 | 0.74 (0.67,0.82), <0.001 | -0.054 (-0.12,0.009), 0.094 | -0.23 (-0.31,-0.15), <0.001 |
| **Treatment**, PCMH | 1.62 (1.18,2.22), 0.003 | -0.053 (-0.21,0.11), 0.52 | 0.22 (-0.044,0.49), 0.10 |
| **Interaction**, 2020×PCMH | 0.25 (0.12,0.50), <0.001 | -0.28 (-0.61,0.038), 0.084 | -0.81 (-1.07,-0.54), <0.001 |
| **Birth year** | 0.98 (0.98,0.99), <0.001 | 0.004 (0.001,0.006), 0.008 | -0.007 (-0.012,-0.002), 0.004 |
| **Gender**, Male | 1.14 (1.00,1.30), 0.045 | 0.091 (0.038,0.14), 0.001 | 0.16 (0.067,0.25), 0.001 |
| **Housing**, Private | 3.03 (1.76,5.19), <0.001 | 0.21 (-0.36,0.77), 0.48 | 1.16 (-0.09,2.41), 0.069 |
| **Ethnicity** |  |  |  |
| Indian & Sikh | 1.19 (0.84,1.68), 0.34 | -0.027 (-0.24,0.19), 0.80 | 0.080 (-0.21,0.37), 0.59 |
| Malay | 1.06 (0.36,3.11), 0.92 | -0.28 (-0.43,-0.12), <0.001 | -0.18 (-0.69,0.33), 0.49 |
| **CCI** | 1.24 (1.19,1.29), <0.001 | 0.044 (0.029,0.060), <0.001 | 0.17 (0.14,0.19), <0.001 |

**Appendix Table 3** Two-part model results for emergency department visits

| **Emergency Department visits** | | | |
| --- | --- | --- | --- |
|  | Part 1 (Logistic)  OR (95% CI), *p* | Part 2 (Poisson)  Log-counts (95% CI), *p* | Combined (Margins)  dy/dx (95%CI), *p* |
| **Time since enrolment** |  |  |  |
| ≥8 quarters before enrolment quarter [Q-8] | 0.40 (0.23,0.71), 0.002 | -0.13 (-0.46,0.20), 0.44 | -0.044 (-0.072,-0.016), 0.002 |
| 7Q quarters before enrolment quarter [Q-7] | 0.41 (0.17,0.99), 0.047 | -0.057 (-0.45,0.33), 0.77 | -0.040 (-0.081,<0.001), 0.054 |
| 6 quarters before enrolment quarter [Q-6] | 0.68 (0.31,1.50), 0.34 | -0.22 (-0.56,0.12), 0.21 | -0.026 (-0.063,0.011), 0.16 |
| 5 quarters before enrolment quarter [Q-5] | 0.40 (0.17,0.93), 0.033 | -0.17 (-0.53,0.19), 0.36 | -0.046 (-0.085,-0.007), 0.020 |
| 4 quarters before enrolment quarter [Q-4] | 0.74 (0.35,1.57), 0.44 | -0.25 (-0.59,0.088), 0.15 | -0.024 (-0.059,0.011), 0.18 |
| 3 quarters before enrolment quarter [Q-3] | 0.99 (0.51,1.94), 0.99 | -0.22 (-0.56,0.12), 0.21 | -0.010 (-0.042,0.022), 0.54 |
| 2 quarters before enrolment quarter [Q-2] | 0.63 (0.29,1.36), 0.24 | -0.28 (-0.61,0.058), 0.11 | -0.032 (-0.067,0.004), 0.081 |
| (Quarter before enrolment quarter [Q-1]) | 1 | 0 | 0 |
| Enrolment quarter [Q0] | 1.23 (0.67,2.29), 0.50 | -0.23 (-0.56,0.10), 0.18 | -0.001 (-0.031,0.029), 0.93 |
| Quarter after enrolment quarter [Q1] | 1.21 (0.65,2.25), 0.54 | -0.23 (-0.55,0.084), 0.15 | -0.002 (-0.032,0.027), 0.88 |
| 2 quarters after enrolment quarter [Q2] | 1.27 (0.68,2.36), 0.46 | -0.019 (-0.37,0.33), 0.91 | 0.009 (-0.021,0.040), 0.56 |
| 3 quarters after enrolment quarter [Q3] | 0.86 (0.42,1.75), 0.67 | -0.14 (-0.51,0.24), 0.47 | -0.013 (-0.047,0.022), 0.47 |
| ≥4 quarters after enrolment quarter [Q4] | 0.50 (0.25,1.00), 0.049 | -0.23 (-0.49,0.022), 0.073 | -0.039 (-0.070,-0.008), 0.013 |
| **Calendar Time** |  |  |  |
| 2014-15 | 0.82 (0.70,0.95), 0.010 | -0.030 (-0.087,0.026), 0.29 | -0.010 (-0.016,-0.003), 0.006 |
| 2016 | 0.83 (0.71,0.98), 0.026 | 0.015 (-0.049,0.079), 0.65 | -0.007 (-0.014,<0.001), 0.061 |
| 2017 | 0.98 (0.84,1.13), 0.75 | -0.016 (-0.072,0.040), 0.58 | -0.002 (-0.009,0.005), 0.61 |
| 2018 | 0.93 (0.79,1.08), 0.34 | 0.078 (0.015,0.14), 0.016 | <0.001 (-0.008,0.008), 0.93 |
| (2019) | 1 | 0 | 0 |
| 2020 | 0.71 (0.55,0.91), 0.007 | 0.025 (-0.075,0.13), 0.63 | -0.013 (-0.022,-0.003), 0.011 |
| **Treatment**, PCMH | 1.86 (1.12,3.09), 0.017 | 0.13 (-0.17,0.44), 0.39 | 0.043 (-0.003,0.090), 0.069 |
| **Interaction**, 2020×PCMH | 0.50 (0.15,1.66), 0.26 | 0.10 (-0.29,0.50), 0.61 | -0.037 (-0.10,0.031), 0.28 |
| **Birth year** | 0.96 (0.95,0.97), <0.001 | -0.002 (-0.006, <0.001), 0.14 | -0.002 (-0.002,-0.001), <0.001 |
| **Gender**, Male | 1.06 (0.91,1.24), 0.46 | 0.046 (-0.005,0.97), 0.077 | 0.005 (-0.003,0.012), 0.21 |
| **Housing**, Private | 1.50 (0.45,4.99), 0.51 | 0.023 (-0.15,0.19), 0.79 | 0.022 (-0.052,0.096), 0.57 |
| **Ethnicity** |  |  |  |
| Indian & Sikh | 1.25 (0.76,2.07), 0.38 | 0.065 (-0.053,0.18), 0.28 | 0.014 (-0.014,0.042), 0.32 |
| Malay | 1.02 (0.41,2.57), 0.97 | -0.002 (-0.16,0.16), 0.98 | <0.001 (-0.039,0.041), 0.97 |
| **CCI** | 1.23 (1.18,1.29), <0.001 | 0.014 (0.004,0.024), 0.007 | 0.009 (0.008,0.011), <0.001 |

**Appendix Table 4** Two-part model results for inpatient admissions

| **Inpatient Admissions** | | | |
| --- | --- | --- | --- |
|  | Part 1 (Logistic)  OR (95% CI), *p* | Part 2 (Poisson)  Log-counts (95% CI), *p* | Combined (Margins)  dy/dx (95%CI), *p* |
| **Time since enrolment** |  |  |  |
| ≥8 quarters before enrolment quarter [Q-8] | 0.27 (0.14,0.50), <0.001 | -0.07 (-0.24,0.086), 0.36 | -0.041 (-0.06,-0.02), <0.001 |
| 7Q quarters before enrolment quarter [Q-7] | 0.12 (0.030,0.51), 0.004 | -0.10 (-0.29,0.079), 0.27 | -0.064 (-0.11,-0.02), 0.003 |
| 6 quarters before enrolment quarter [Q-6] | 0.58 (0.24,1.41), 0.23 | -0.13 (-0.31,0.050), 0.16 | -0.020 (-0.05,0.01), 0.14 |
| 5 quarters before enrolment quarter [Q-5] | 0.31 (0.11,0.86), 0.025 | 0.084 (-0.23,0.39), 0.60 | -0.032 (-0.06,0), 0.049 |
| 4 quarters before enrolment quarter [Q-4] | 0.37 (0.14,0.99), 0.047 | -0.14 (-0.32,0.035), 0.12 | -0.033 (-0.06,0), 0.025 |
| 3 quarters before enrolment quarter [Q-3] | 0.71 (0.32,1.58), 0.40 | -0.065 (-0.31,0.18), 0.60 | -0.012 (-0.04,0.01), 0.34 |
| 2 quarters before enrolment quarter [Q-2] | 0.44 (0.17,1.11), 0.081 | -0.010 (-0.32,0.30), 0.95 | -0.025 (-0.05,0), 0.095 |
| (Quarter before enrolment quarter [Q-1]) | 1 | 0 | 0 |
| Enrolment quarter [Q0] | 1.01 (0.52,1.98), 0.97 | -0.17 (-0.34,-0.011), 0.036 | -0.005 (-0.03,0.02), 0.63 |
| Quarter after enrolment quarter [Q1] | 1.04 (0.52,2.08), 0.92 | -0.16 (-0.34,0.016), 0.075 | -0.004 (-0.02,0.02), 0.72 |
| 2 quarters after enrolment quarter [Q2] | 0.88 (0.43,1.79), 0.73 | 0.091 (-0.14,0.33), 0.45 | -<0.001 (-0.02,0.02), 0.94 |
| 3 quarters after enrolment quarter [Q3] | 0.90 (0.40,2.00), 0.79 | 0.052 (-0.25,0.35), 0.74 | -0.002 (-0.03,0.02), 0.90 |
| ≥4 quarters after enrolment quarter [Q4] | 0.52 (0.25,1.07), 0.077 | 0.004 (-0.20,0.21), 0.97 | -0.019 (-0.04,0), 0.093 |
| **Calendar Time** |  |  |  |
| 2014-15 | 0.76 (0.64,0.91), 0.002 | -0.044 (-0.11,0.026), 0.22 | -0.010 (-0.02,0), 0.001 |
| 2016 | 0.72 (0.60,0.86), <0.001 | 0.010 (-0.063,0.083), 0.79 | -0.010 (-0.02,0), 0.001 |
| 2017 | 0.87 (0.73,1.03), 0.10 | -0.048 (-0.12,0.023), 0.19 | -0.006 (-0.01,0), 0.042 |
| 2018 | 0.85 (0.72,0.99), 0.039 | 0.044 (-0.042,0.13), 0.32 | -0.004 (-0.01,0), 0.20 |
| (2019) | 1 | 0 | 0 |
| 2020 | 0.88 (0.68,1.14), 0.34 | 0.16 (-0.007,0.32), 0.060 | 0.001 (-0.010,0.012), 0.81 |
| **Treatment**, PCMH | 2.18 (1.25,3.80), 0.006 | -0.002 (-0.17,0.17), 0.98 | 0.030 (-0.001,0.061), 0.06 |
| **Interaction**, 2020×PCMH | 0.55 (0.18,1.69), 0.30 | -0.13 (-0.49,0.24), 0.50 | -0.031 (-0.071,0.010), 0.14 |
| **Birth year** | 0.96 (0.95,0.97), <0.001 | -0.002 (-0.005, 0.001), 0.24 | <0.001 (-0.001,-<0.001), <0.001 |
| **Gender**, Male | 1.07 (0.9,1.27), 0.44 | 0.009 (-0.042,0.060), 0.73 | 0.002 (-0.003,0.008), 0.41 |
| **Housing**, Private | 1.68 (0.44,6.51), 0.45 | 0.084 (-0.055,0.22), 0.24 | 0.024 (-0.044,0.092), 0.50 |
| **Ethnicity** |  |  |  |
| Indian & Sikh | 0.86 (0.46,1.60), 0.64 | 0.065 (-0.061,0.19), 0.31 | -0.002 (-0.020,0.015), 0.80 |
| Malay | 0.48 (0.22,1.04), 0.062 | -0.11 (-0.22,-0.002), 0.047 | -0.017 (-0.028,-0.007), 0.001 |
| **CCI** | 1.29 (1.24,1.35), <0.001 | 0.022 (0.012,0.033), <0.001 | 0.008 (0.007,0.010), <0.001 |
